# Supplementary material for: Low-Dose Tacrolimus Promotes the Migration and Invasion and Nitric Oxide Production in the Human-Derived First Trimester Extravillous Trophoblast Cells In Vitro
Source: MDPI journal article supplement (doi:10.3390/ijms23158426), 2022-07-29

Supplementary Tables for:

**Low-dose Tacrolimus Promotes the Migration and Invasion and Nitric Oxide Production in the Human-derived First Trimester  
Extravillous Trophoblast Cells *In Vitro***

**By:**

Ahmad J.H. Albaghdadi, Kassandra Coyle, and Frederick W. K. Kan<sup>1</sup>

Department of Biomedical and Molecular Sciences, Faculty of Health Sciences, Queen's University, Kingston, Ontario, Canada K7L 3N6

<sup>1</sup>Corresponding author: Dr. Frederick W. K. Kan

Address: Department of Biomedical and Molecular Sciences, Faculty of Health Sciences, Queen's University, Kingston, Ontario, Canada,

K7L3N6

Email: kanfwk@queensu.ca

Telephone: +1 613-533-2863

Supplementary Table S1: Primary antibodies used in this study.

| Antibody ID | Antibody Name                                                              | Target Antigen                                                                                          | Clonality  | Host Organism | Dilution | Vendor                    | Catalogue Number | Specific Use                                                           |
|-------------|----------------------------------------------------------------------------|---------------------------------------------------------------------------------------------------------|------------|---------------|----------|---------------------------|------------------|------------------------------------------------------------------------|
| AB_2166687  | Mouse Anti-PR Monoclonal Antibody, Unconjugated, Clone F-4                 | PGR human, mouse, rat                                                                                   | Monoclonal | Mouse         | 1:100    | Santa Cruz Biotechnology  | SC-166169        | Western blot (WB) detection of the human PGR                           |
| AB_2864799  | Mouse Anti-PR- Alexa Fluor® 647 Monoclonal Antibody, Conjugated, Clone F-4 | PGR human, mouse, rat                                                                                   | Monoclonal | Mouse         | 1:100    | Santa Cruz Biotechnology  | sc-166169 AF647  | Immunofluorescent (IF) detection of the human PGR                      |
| AB_325316   | Phospho-Progesterone Receptor (Ser294) Monoclonal Antibody (608)           | Phospho-Progesterone Receptor (Ser294) human                                                            | Monoclonal | Mouse         | 1:200    | Thermo Fisher Scientific  | MA1-414          | Western blot (WB) detection of the human phosphorylated PGR (pPGR)     |
| AB_628293   | Stat3 (F-2) antibody                                                       | Recombinant protein corresponding to AA 50-240 mapping to amino acids of human origin human, mouse, rat | Monoclonal | Mouse         | 1:300    | Santa Cruz Biotechnology  | SC-8019          | Western blot (WB) detection of the human STAT3                         |
| AB_2491009  | Phospho-Stat3 (Tyr705) (D3A7) XP Rabbit mAb antibody                       | Phospho-Stat3 (Tyr705) human, mouse, rat                                                                | Monoclonal | Rabbit        | 1:200    | Cell Signaling Technology | 9145             | Western blot (WB) detection of the human phosphorylated STAT3 (pSTAT3) |

Supplementary Table S1: Primary antibodies used in this study (continued).

| Antibody ID | Antibody Name                                                | Target Antigen                      | Clonality  | Host Organism | Dilution | Vendor                   | Catalogue Number | Specific Use                                                                                                 |
|-------------|--------------------------------------------------------------|-------------------------------------|------------|---------------|----------|--------------------------|------------------|--------------------------------------------------------------------------------------------------------------|
| AB_2533121  | Anti-eNOS Monoclonal Antibody, Unconjugated, Clone eNOS-9D10 | eNOS bovine                         | Monoclonal | Mouse         | 1:300    | ThermoFisher Scientific  | 33-4600          | Western blot (WB) detection of the human eNOS                                                                |
| AB_2533285  | Phospho-eNOS (Ser1179) Polyclonal Antibody                   | Phospho-eNOS (Ser1179) bovine       | Polyclonal | Rabbit        | 1:200    | ThermoFisher Scientific  | 36-9100          | Western blot (WB) detection of the human phosphorylated eNOS <sup>Ser1179</sup> (p-eNOS <sup>Ser1179</sup> ) |
| AB_10707645 | Phospho-NOS3 (p-NOS3) (pT495.33) antibody                    | p-NOS3 (pT495.33) human, mouse, rat | Monoclonal | Mouse         | 1:200    | Santa Cruz Biotechnology | SC-136519        | Western blot (WB) detection of the human phosphorylated eNOS <sup>Thr495</sup> (p-eNOS <sup>Thr495</sup> )   |
| AB_2293930  | FKBP52 Affinity Purified Polyclonal antibody Human/Mouse/Rat | FKBP52 human, mouse, rat            | Polyclonal | Goat          | 1:200    | R and D Systems          | AF4095           | WB and IF detections of the human FKBP52 in                                                                  |
| AB_626658   | Akt1 (B-1) antibody                                          | AKT1 human, mouse, rat              | Monoclonal | Mouse         | 1:200    | Santa Cruz Biotechnology | sc-5298          | Wb detection of the protein kinase Akt in HTR-8/SVneo cells                                                  |
| AB_2861344  | p-Akt1/2/3 Antibody (C-11)                                   | p-Akt1/2/3 human, mouse, rat        | Monoclonal | Mouse         | 1:200    | Santa Cruz Biotechnology | sc-514032        | Wb detection of the phosphorylated protein kinase Akt in HTR-8/SVneo cells                                   |

Supplementary Table S2: Secondary antibodies used in this study

| Antibody ID | Antibody Name                                                    | Target Antigen  | Clonality  | Host Organism | Dilution | Vendor                   | Catalogue Number | Specific Use                                              |
|-------------|------------------------------------------------------------------|-----------------|------------|---------------|----------|--------------------------|------------------|-----------------------------------------------------------|
| AB_628489   | Mouse anti-goat IgG-FITC                                         | IgG goat        | Monoclonal | Mouse         | 1:3000   | Santa Cruz Biotechnology | 33-4600          | Secondary Ab used in the IF detection of the human FKBP52 |
| AB_631746   | Goat anti-rabbit IgG-HRP antibody                                | IgG rabbit      | Polyclonal | Rabbit        | 1:5000   | Santa Cruz Biotechnology | SC-2004          | Secondary Ab used in WB                                   |
| AB_2536527  | Goat anti-Mouse IgG (H+L) Cross-Adsorbed Secondary Antibody, HRP | IgG (H+L) mouse | Polyclonal | Goat          | 1:1000   | ThermoFisher Scientific  | G21040           | Secondary Ab used in WB                                   |

Supplementary Figures for:

**Low-dose Tacrolimus Promotes the Migration and Invasion and Nitric Oxide Production in the Human-derived First Trimester  
Extravillous Trophoblast Cells *In Vitro***

**By:**

Ahmad J.H. Albaghdadi, Kassandra Coyle and Frederick W. K. Kan<sup>1</sup>

Department of Biomedical and Molecular Sciences, Faculty of Health Sciences, Queen's University, Kingston, Ontario, Canada K7L 3N6

<sup>1</sup>Corresponding author: Dr. Frederick W. K. Kan

Address: Department of Biomedical and Molecular Sciences, Faculty of Health Sciences, Queen's University, Kingston, Ontario, Canada,

K7L3N6

Email: kanfwk@queensu.ca

Telephone: +1 613 533-2863

## Supplementary Figure Legends

### Supplementary Figure S1:

Detection of PGR mRNA in HTR8/SVneo cells treated with DMSO only (Control), tacrolimus (TAC), L-NAME, TAC+L-NAME, Mifepristone and TAC+ Mifepristone, respectively. Tacrolimus significantly ( $p < 0.05$ ) induced the expression of the PGR mRNA in the HTR-8/SVneo cells irrespective of the presence or absence of the eNOS and PGR inhibitors; L-NAME and Mifepristone, respectively. mRNA copies were calculated using the comparative threshold cycle ( $\Delta\Delta CT$ ) method with normalization to GAPDH.  $R$  values were measured as the negative values of  $\Delta\Delta CT$  as exponent of 2 according to the equation:  $R = 2^{-\Delta\Delta CT}$  where  $\Delta\Delta CT = \Delta CT (\text{Target}) - \Delta CT (\text{Endogenous Control})$ . GAPDH primers were utilized as positive controls. Negative controls without RNA and without reverse transcriptase were also performed.

### Supplementary Figure S2:

Effects of low-dose tacrolimus on IL6 secretion in HTR8/SVneo cells. A highly sensitive human IL6 ELISA kit (Catalog number: EH2IL6, Invitrogen) was used to detect alterations in concentrations of this cytokine in HTR8/SVneo cells in conditioned media after 24 hours of treatment with low-dose tacrolimus (10ng/ml) alone or in a combination formulation with L-NAME or mifepristone. Compared to the DMSO-free control, a significant trend ( $p = 0.06$ ) increase in IL6 production was observed among all treatment conditions. However, compared to DMSO-only treated controls, none of the treatment conditions used in this study was able to influence the release of IL6 in HTR8/SVneo cells. Data are presented as mean  $\pm$  SD.

**Supplementary Figure S3:**

Effects of low-dose tacrolimus on TNF $\alpha$  secretion in HTR8/SVneo cells. A highly sensitive human TNF $\alpha$  ELISA kit (Catalog number: BMS223HS, Invitrogen) was used to detect alterations in concentrations of this cytokine in HTR8/SVneo cells in conditioned media after 24 hours of treatment with low-dose tacrolimus (10ng/ml) alone or in a combination formulation with L-NAME or mifepristone. Compared to DMSO-only treated controls, Low-dose tacrolimus and L-NAME significantly increased the concentrations of TNF $\alpha$  in the condition medium of HTR8/SVneo cells. Data are presented as mean  $\pm$  SD.

**Supplementary Figure S4:**

A: Representative Western blot detection of protein expression and phosphorylation of Akt in HTR8/SVneo cells treated with DMSO-only (Control: Ctrl), tacrolimus (TAC), mifepristone (Mife), and TAC+ mifepristone (TAC+ Mife), respectively. B: Histogram analysis of the relative expression of pAkt/Akt in HTR8/SVneo cells demonstrating a significant time-dependent increase in protein expression and phosphorylation of Akt in the TAC- and TAC+ Mife treated cells over 72 hours of incubation. MWM: Molecular Weight Markers.

Supplementary Figure S1

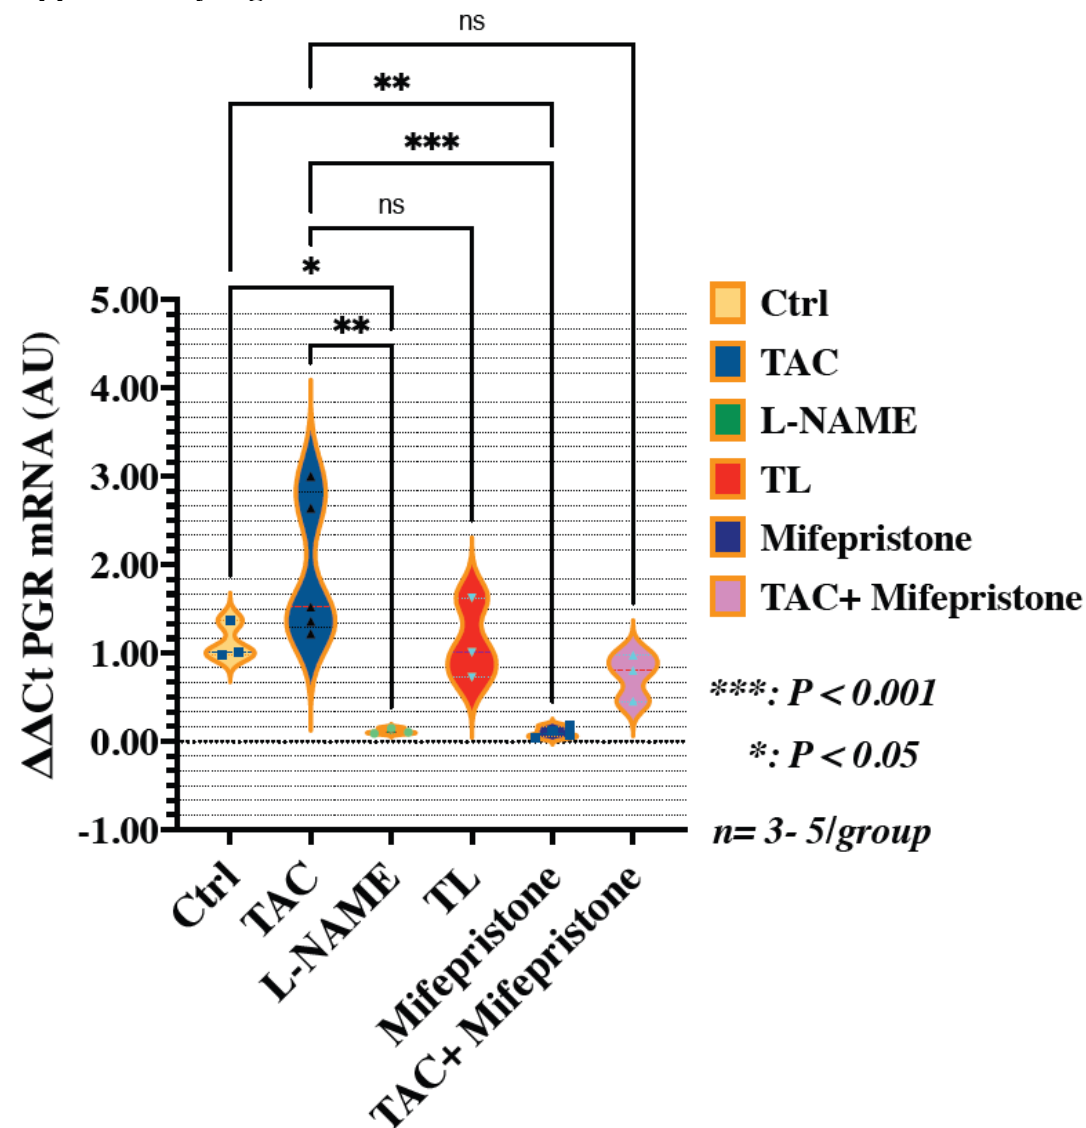



**IL6 (pg/ml)**

**Legend:**

- DMSO-Free Ctrl
- DMSO
- TAC
- L-MAME
- TAC+L-NAME
- Mifepristone
- TAC+ Mifepristone

**Statistical Significance:**

- \*:  $P < 0.05$
- ns:  $P \geq 0.05$

**Approximate IL6 (pg/ml) values:**

| Group             | Approximate IL6 (pg/ml) |
|-------------------|-------------------------|
| DMSO-Free Ctrl    | 1.2                     |
| DMSO              | 2.1                     |
| TAC               | 2.5                     |
| L-MAME            | 2.1                     |
| TAC+L-NAME        | 2.8                     |
| Mifepristone      | 2.1                     |
| TAC+ Mifepristone | 2.1                     |

Supplementary Figure S3

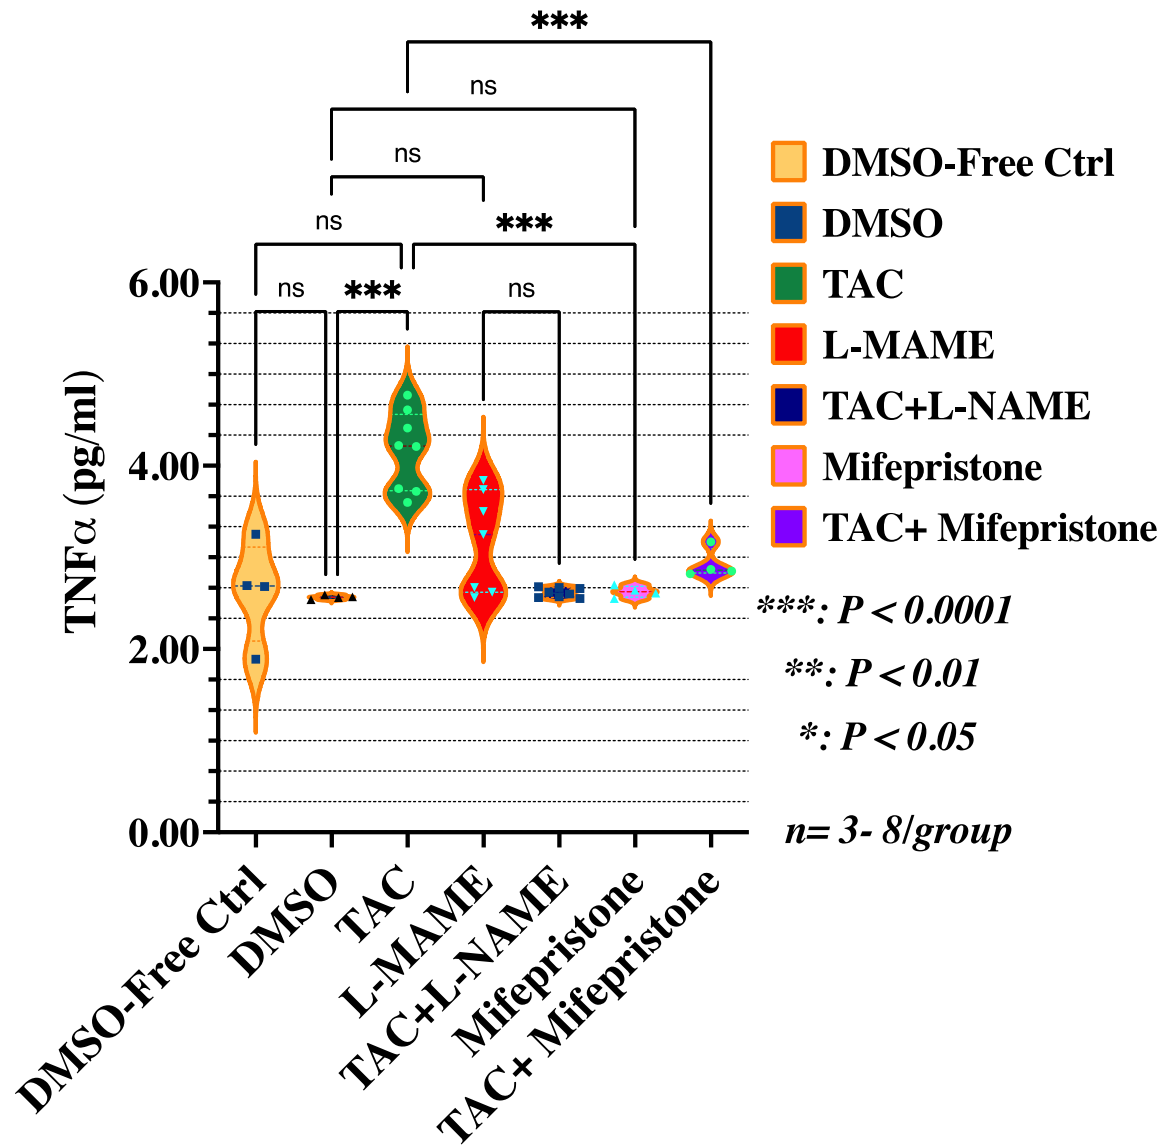

### Supplemental Figure S4

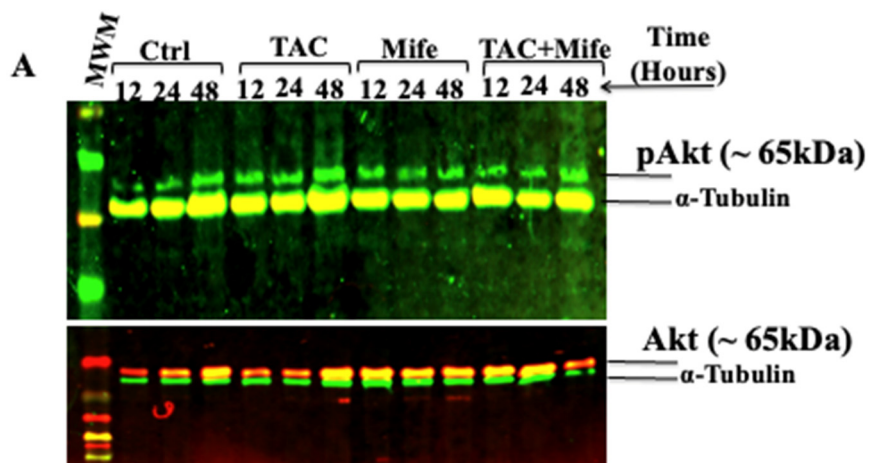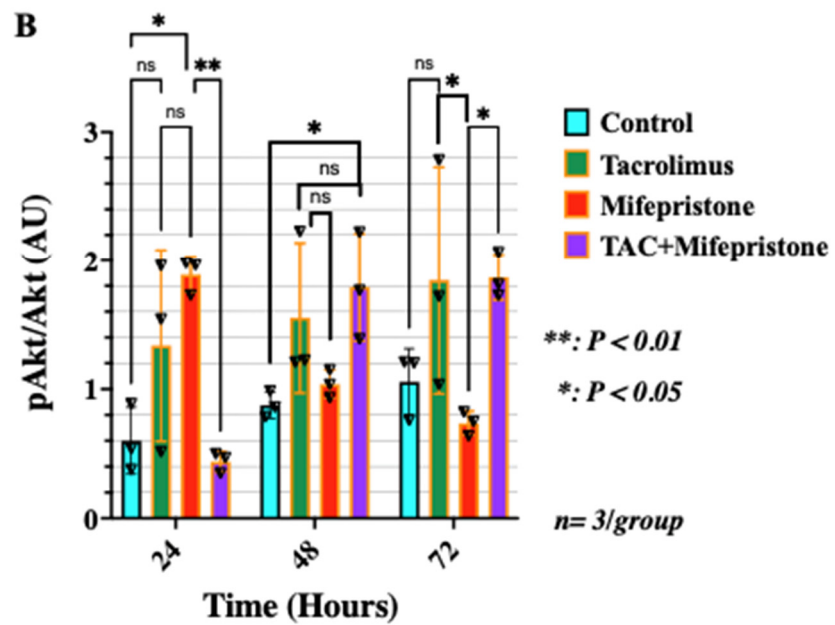

Supplement: s1 [file s1]
